# Supplementary material
Source: HighWire-hosted journal article supplement (https://www.cmaj.ca/highwire/filestream/58191/field_highwire_adjunct_files/1/colorectal-zary-2-at_online_.pdf)
Supplement: colorectal-zary-2-at_online_.pdf [file colorectal-zary-2-at_online_.pdf]

**Appendix 2: Characteristics of survey respondents eligible for colorectal cancer screening,\* by number of contacts with a family physician in the 12 months before the survey**

| Characteristic                     | No. (%)† of respondents<br>n = 12 766 | No. of contacts with a family physician;<br>no. (%)† of respondents |                  |                  |                  |
|------------------------------------|---------------------------------------|---------------------------------------------------------------------|------------------|------------------|------------------|
|                                    |                                       | 0<br>n = 2 012                                                      | 1-2<br>n = 4 289 | 3-4<br>n = 3 254 | > 4<br>n = 3 211 |
| <b>Age, yr</b>                     |                                       |                                                                     |                  |                  |                  |
| 50-59                              | 4 731 (44.6)                          | 921 (17.8)                                                          | 1 806 (39.1)     | 998 (22.2)       | 1 006 (20.9)     |
| 60-69                              | 3 554 (26.9)                          | 580 (15.3)                                                          | 1 194 (35.2)     | 936 (24.9)       | 844 (24.5)       |
| 70-79                              | 2 915 (19.2)                          | 356 (10.8)                                                          | 878 (29.9)       | 855 (29.2)       | 826 (30.1)       |
| ≥ 80                               | 1 566 (9.2)                           | 155 (9.2)                                                           | 411 (24.0)       | 465 (29.2)       | 535 (37.6)       |
| <b>Sex</b>                         |                                       |                                                                     |                  |                  |                  |
| Male                               | 5 891 (50.4)                          | 901 (17.8)                                                          | 2 303 (35.2)     | 1 819 (24.0)     | 1 852 (22.9)     |
| Female                             | 6 875 (49.6)                          | 1 111 (12.1)                                                        | 1 986 (34.5)     | 1 435 (25.9)     | 1 359 (27.5)     |
| <b>Ethnic background</b>           |                                       |                                                                     |                  |                  |                  |
| White                              | 11 508 (84.4)                         | 1 826 (15.5)                                                        | 3 908 (35.8)     | 2 952 (25.1)     | 2 822 (23.7)     |
| Non-white                          | 994 (13.5)                            | 134 (11.8)                                                          | 297 (29.4)       | 343 (24.7)       | 320 (34.1)       |
| Unknown                            | 264 (2.1)                             | 52 (2.2)‡                                                           | 84 (2.0)‡        | 59 (1.8)‡        | 69 (2.4)‡        |
| <b>Employment</b>                  |                                       |                                                                     |                  |                  |                  |
| Unemployed                         | 7 512 (51.2)                          | 967 (12.2)                                                          | 2 246 (30.2)     | 2 075 (27.1)     | 2 224 (30.6)     |
| Part time                          | 964 (8.5)                             | 151 (12.7)                                                          | 373 (40.8)       | 242 (26.3)       | 198 (20.2)       |
| Full time                          | 3 900 (36.7)                          | 837 (19.8)                                                          | 1 548 (40.2)     | 838 (21.7)       | 677 (18.3)       |
| Unknown                            | 390 (3.62)                            | 57 (2.8)‡                                                           | 122 (3.5)‡       | 99 (3.5)‡        | 112 (4.4)‡       |
| <b>Income adequacy</b>             |                                       |                                                                     |                  |                  |                  |
| Lowest                             | 458 (2.6)                             | 85 (17.1)                                                           | 113 (22.7)       | 103 (21.9)       | 157 (38.2)       |
| Middle                             | 7 549 (52.3)                          | 1 180 (15.3)                                                        | 2 356 (32.0)     | 1 999 (25.9)     | 2 014 (26.7)     |
| Highest                            | 2 635 (26.8)                          | 438 (15.8)                                                          | 1 057 (41.0)     | 631 (23.7)       | 509 (19.6)       |
| Unknown                            | 2 124 (18.3)                          | 309 (15.4)‡                                                         | 763 (18.8)‡      | 521 (18.0)‡      | 531 (19.7)‡      |
| <b>Education</b>                   |                                       |                                                                     |                  |                  |                  |
| Less than high school              | 4 208 (26.9)                          | 672 (14.3)                                                          | 1 144 (27.6)     | 1 134 (25.7)     | 1 258 (32.4)     |
| Completed high school              | 2 372 (19.9)                          | 377 (15.7)                                                          | 853 (36.3)       | 594 (24.9)       | 548 (23.2)       |
| Postsecondary                      | 5 922 (50.2)                          | 924 (15.1)                                                          | 2 202 (38.5)     | 1 458 (24.5)     | 1 338 (21.8)     |
| Unknown                            | 264 (3.0)                             | 39 (2.9)‡                                                           | 90 (2.6)‡        | 68 (3.2)‡        | 67 (3.6)‡        |
| <b>Self-reported health status</b> |                                       |                                                                     |                  |                  |                  |
| Excellent                          | 2 077 (17.6)                          | 523 (24.1)                                                          | 1 012 (49.7)     | 363 (17.5)       | 179 (8.7)        |
| Very good                          | 4 076 (31.7)                          | 718 (16.8)                                                          | 1 551 (40.3)     | 1 120 (26.9)     | 687 (15.9)       |
| Good                               | 4 062 (32.2)                          | 550 (12.8)                                                          | 1 275 (31.9)     | 1 156 (27.9)     | 1 081 (27.4)     |
| Fair                               | 1872 (13.6)                           | 179 (8.1)                                                           | 368 (19.4)       | 480 (23.5)       | 845 (48.9)       |
| Poor                               | 669 (4.9)                             | 42 (3.4)                                                            | 79 (8.9)         | 133 (23.5)       | 415 (64.2)       |
| Unknown                            | 10 (0.04)                             | 0 (0.0)‡                                                            | 4 (0.04)‡        | 2 (0.03)‡        | 4 (0.07)‡        |

\*Respondents were considered eligible for screening if they were aged 50 years or greater and were at average risk for colorectal cancer.

†Percentages are weighted to the Canadian population.

‡Weighted column distribution.
